# Supplementary material for: Glutathione-Loaded Solid Lipid Microparticles as Innovative Delivery System for Oral Antioxidant Therapy
Source: Pharmaceutics. 2019 Jul 27;11(8):364. doi: 10.3390/pharmaceutics11080364 (PMC6723327; doi:10.3390/pharmaceutics11080364)
Supplement: Supplementary file 1 [file pharmaceutics-11-00364-s001.pdf]

# Supplementary Materials: Glutathione-Loaded Solid Lipid Microparticles as Innovative Delivery System for Oral Antioxidant Therapy

Serena Bertoni, Beatrice Albertini, Carlotta Facchini, Cecilia Prata and Nadia Passerini

## 1. HPLC Analysis of GSH

*Direct method.* An example of chromatogram and the calibration plots are reported in Figure S1. The limit of detection (LOD) and the limit of quantification (LOQ) were determined with the signal-to-noise ratio method [1] and are reported in the Table S1.

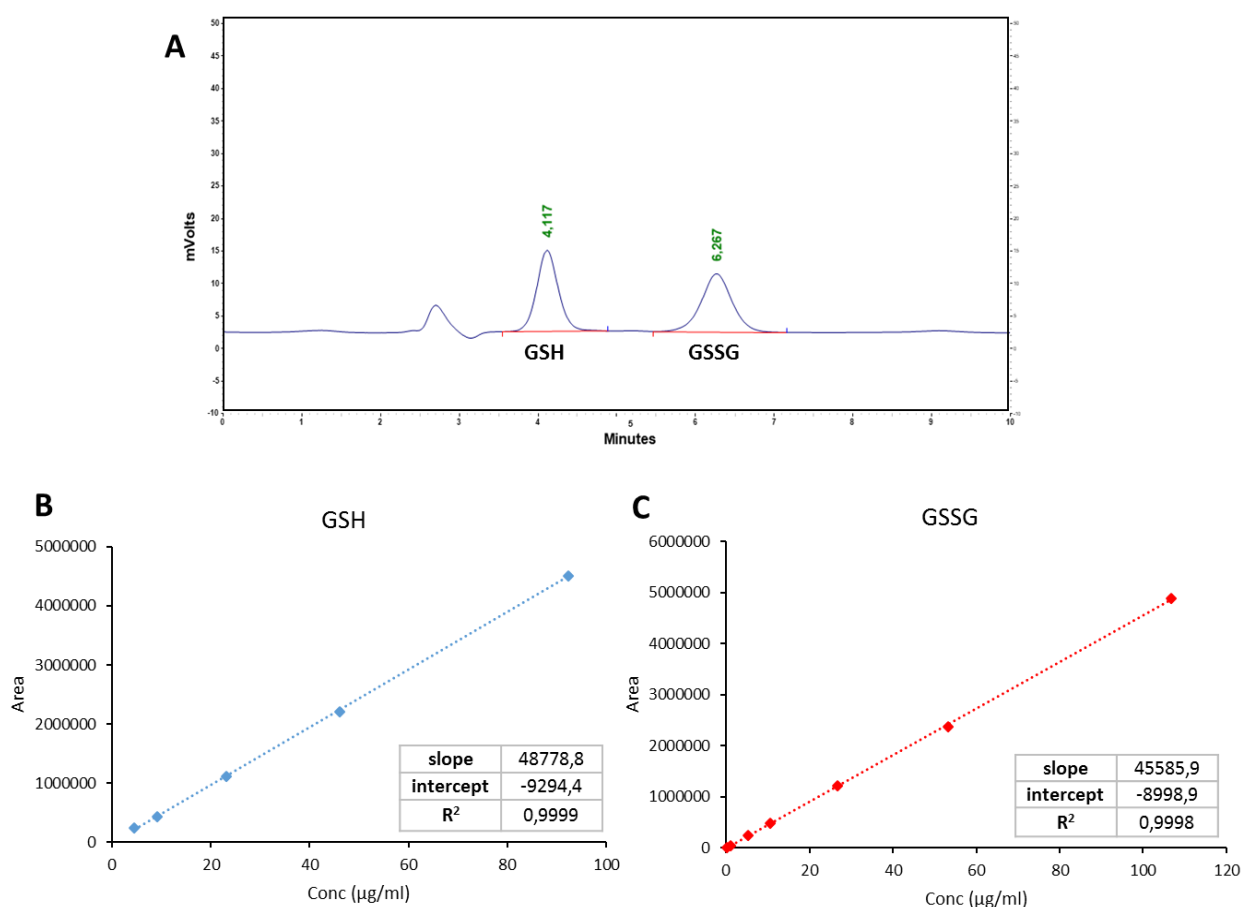

**Figure S1.** HPLC chromatograms of a standard GSH (Rt = 4.1 min) and GSSG (Rt = 6.3 min) solution (A); HPLC linearity: calibration plot, slope, y-intercept and determination coefficient of GSH (B) and GSSG (C).

**Table S1.** LOD and LOQ of GSH and GSSG by direct HPLC method.

|      | LOD (µg/ml) | LOQ (µg/ml) |
|------|-------------|-------------|
| GSH  | 0.028       | 0.092       |
| GSSG | 0.046       | 0.153       |

*Derivatization method.* An example of chromatogram and the calibration plot are reported in Figure S2.

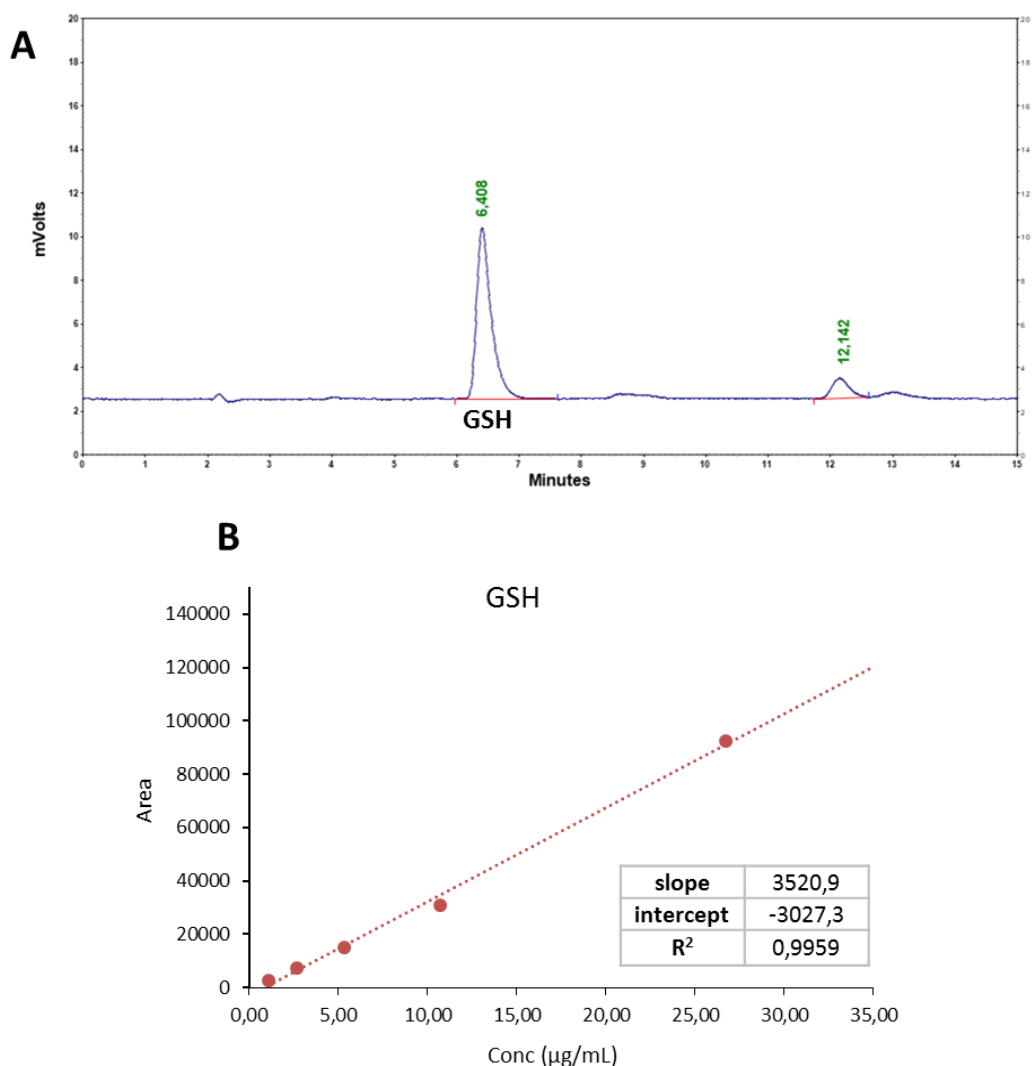

**Figure S2:** HPLC chromatograms of a standard GSH solution ( $R_t = 6.4$  min), while the unreacted 1,4-Naphthoquinone (NPQ) is detected at  $R_t = 12.1$  min (**A**); HPLC linearity: calibration plot, slope, y-intercept and determination coefficient of GSH (**B**)

## 2. Preparation of Solid Lipid Microparticles (SLMs) for Intracellular ROS Experiment

The antioxidant effect of 20% GSH-loaded SLMs was compared with SLMs containing another antioxidant compound, catalase (CAT) or a mixture of both compounds to have the same antioxidant concentration. The samples used for intracellular ROS experiment are schematized in Table S2.

**Table S2.** Composition of SLMs used for intracellular ROS studies.

| SLMs    | Constituents (% <i>w/w</i> ) |      |      |
|---------|------------------------------|------|------|
|         | Dynasan 114                  | GSH  | CAT  |
| Un MPs  | 100.0                        | -    | -    |
| GSH MPs |                              | 20.0 |      |
| CAT MPs | 80.0                         | -    | 20.0 |
| Mix MPs |                              | 10.0 | 10.0 |

SLMs containing CAT and the mixture of both antioxidant compounds were produced using the same conditions of the spray congealing equipment employed for GSH MPs (temperature of the nozzle was 5 °C above the melting point of the carrier, and inlet air pressure was 1.5 bar).

Specifically, Dynasan 114 was melted at about 70°C. CAT or the mixture of GSH and CAT were added as powders and suspended into the melted carriers, prior to atomization.

### 3. Cell Viability after Treatment with SLMs in the Presence or Absence of Oxidative Stress Mimicked by H<sub>2</sub>O<sub>2</sub>

At the end of the 6 h incubation with the SLMs, the cell viability was measured and the results are reported in Figure S3. As expected, cell viability was always close to 100% for the cells in basal conditions, but decreased to about 80% in oxidative stress conditions ( $p < 0.001$ ). Interestingly, the treatment with SLMs containing GSH ( $p < 0.05$ ) and the combination of GSH and CAT ( $p < 0.001$ ) was able to limit the cell damage by ROS overproduction and restore the cell viability, according to data obtained by the evaluation of intracellular ROS levels.

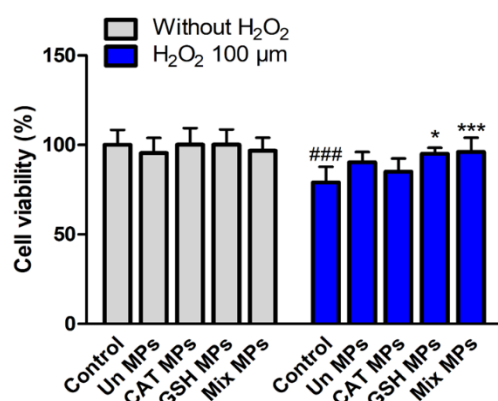

**Figure S3:** Viability of HT29 cells after incubation with SLMs for 6 h assessed by MTT assay (in the same experimental conditions used for the determination of intracellular ROS levels). Values are expressed as means ( $n = 4$ )  $\pm$  SD. The level of significance between the Control sample treated with H<sub>2</sub>O<sub>2</sub> and the Control without pre-treatment was set at the probability of  $^{###}p < 0.001$ . The level of significance between the GSH MPs and Mix MPs and the corresponding Control was set at the probabilities of  $^{*}p < 0.05$ , and  $^{***}p < 0.001$ .

### References

- [1] A. Shrivastava, V. Gupta, R. Article, Methods for the determination of limit of detection and limit of quantitation of the analytical methods, Chronicles Young Sci. 2 (2011) 21–25. doi:10.4103/2229-5186.79345.
